# Supplementary material
Source: MDPI journal article supplement (https://www.mdpi.com/2076-3417/11/6/2533)
Supplement: s1 [file s1]

## Supporting Information

### **Effects of benzo[a]pyrene, cortisol and 17 $\beta$ -estradiol on liver microsomal EROD activity of *Anguilla anguilla*: An *in vitro* approach**

Carla Ferreira de Melo <sup>1\*</sup>, Miguel Oliveira <sup>2</sup>, Maria Ana Santos <sup>2</sup> and Mário Pacheco <sup>2</sup>

<sup>1</sup> Department of Biology, University of Aveiro, 3810-193 Aveiro, Portugal

<sup>2</sup> Centre for Environmental and Marine Studies (CESAM), Department of Biology, University of Aveiro, 3810-193 Aveiro, Portugal

\* Corresponding author: csafia@ua.pt; Department of Biology, University of Aveiro, 3810-193 Aveiro, Portugal

**Table S1** - Buffers, solvents and solutions used during Experimental Setup

| <b><u>Buffers</u></b>   |                                                                                     |
|-------------------------|-------------------------------------------------------------------------------------|
| <b>BS</b>               | 0.5 $\mu$ M etoxyresorufin in Tris-HCl 0.1 M pH 7.4 with KCl 0.15M and 20% glycerol |
| <b>B</b>                | Tris-HCl 0.1 M pH 7.4 with KCl 0.15M and 20% glycerol                               |
| <b>BSC</b>              | <b>BS</b> with cortisol (final concentration in cuvette = 5.997 ng/ml)              |
| <b>BSE<sub>2</sub></b>  | <b>BS</b> with E <sub>2</sub> (final concentration in cuvette = 5.997 ng/ml)        |
| <b><u>Solvents</u></b>  |                                                                                     |
| <b>DMSO</b>             | Dimethyl sulfoxide                                                                  |
| <b><u>Solutions</u></b> |                                                                                     |
| <b>B[a]P</b>            | Benzo[a]pyrene (0.1, 0.3, 0.9 and 2.7 $\mu$ M) in DMSO                              |

**Table S2** - Experimental liver microsomal EROD activity assay procedures to assess effects of cortisol (C), 17 $\beta$ -estradiol (E<sub>2</sub>) and benzo[a]pyrene (B[a]P), alone or in combination. The numbers (1, 2, 3 and 4) represent the sequence of compounds added to the cuvette [Tris-HCl 0.1 M pH 7.4 with KCl 0.15 M 20% glycerol (B) with 0.5  $\mu$ M ethoxyresorufin (BS); BS with cortisol 5.997 ng/ml (BSC); BS with E<sub>2</sub> 5.997 ng/ml (BSE<sub>2</sub>), dimethyl sulfoxide (DMSO), benzo[a]pyrene (B[a]P)].

| Experimental assay                                                                                   | 5 $\mu$ l microsomes | 1090 $\mu$ l BS | 1090 $\mu$ l BSC | 1090 $\mu$ l BSE <sub>2</sub> | 5 $\mu$ l B | 5 $\mu$ l DMSO | 5 $\mu$ l B[a]P (in DMSO) | 10 $\mu$ l NADPH (10nM) |
|------------------------------------------------------------------------------------------------------|----------------------|-----------------|------------------|-------------------------------|-------------|----------------|---------------------------|-------------------------|
| Effects of 5.997 ng/ml of C                                                                          | 1                    |                 | 2                |                               |             | 3              |                           | 4                       |
| Effects of 5.997 ng/ml of E <sub>2</sub>                                                             | 1                    |                 |                  | 2                             |             | 3              |                           | 4                       |
| Effects of B[a]P (0.1, 0.3, 0.9 and 2.7 $\mu$ M)                                                     | 1                    | 2               |                  |                               |             |                | 3                         | 4                       |
| Effects of B[a]P (0.1, 0.3, 0.9 and 2.7 $\mu$ M) after pre-exposure to 5.997 ng/ml of C              | 1                    |                 | 2                |                               |             |                | 3                         | 4                       |
| Effects of B[a]P (0.1, 0.3, 0.9 and 2.7 $\mu$ M) after pre-exposure to 5.997 ng/ml of E <sub>2</sub> | 1                    |                 |                  | 2                             |             |                | 3                         | 4                       |
